# Supplementary material
Source: PubMed Central journal article supplement (PMC2094297)

Figure E1:

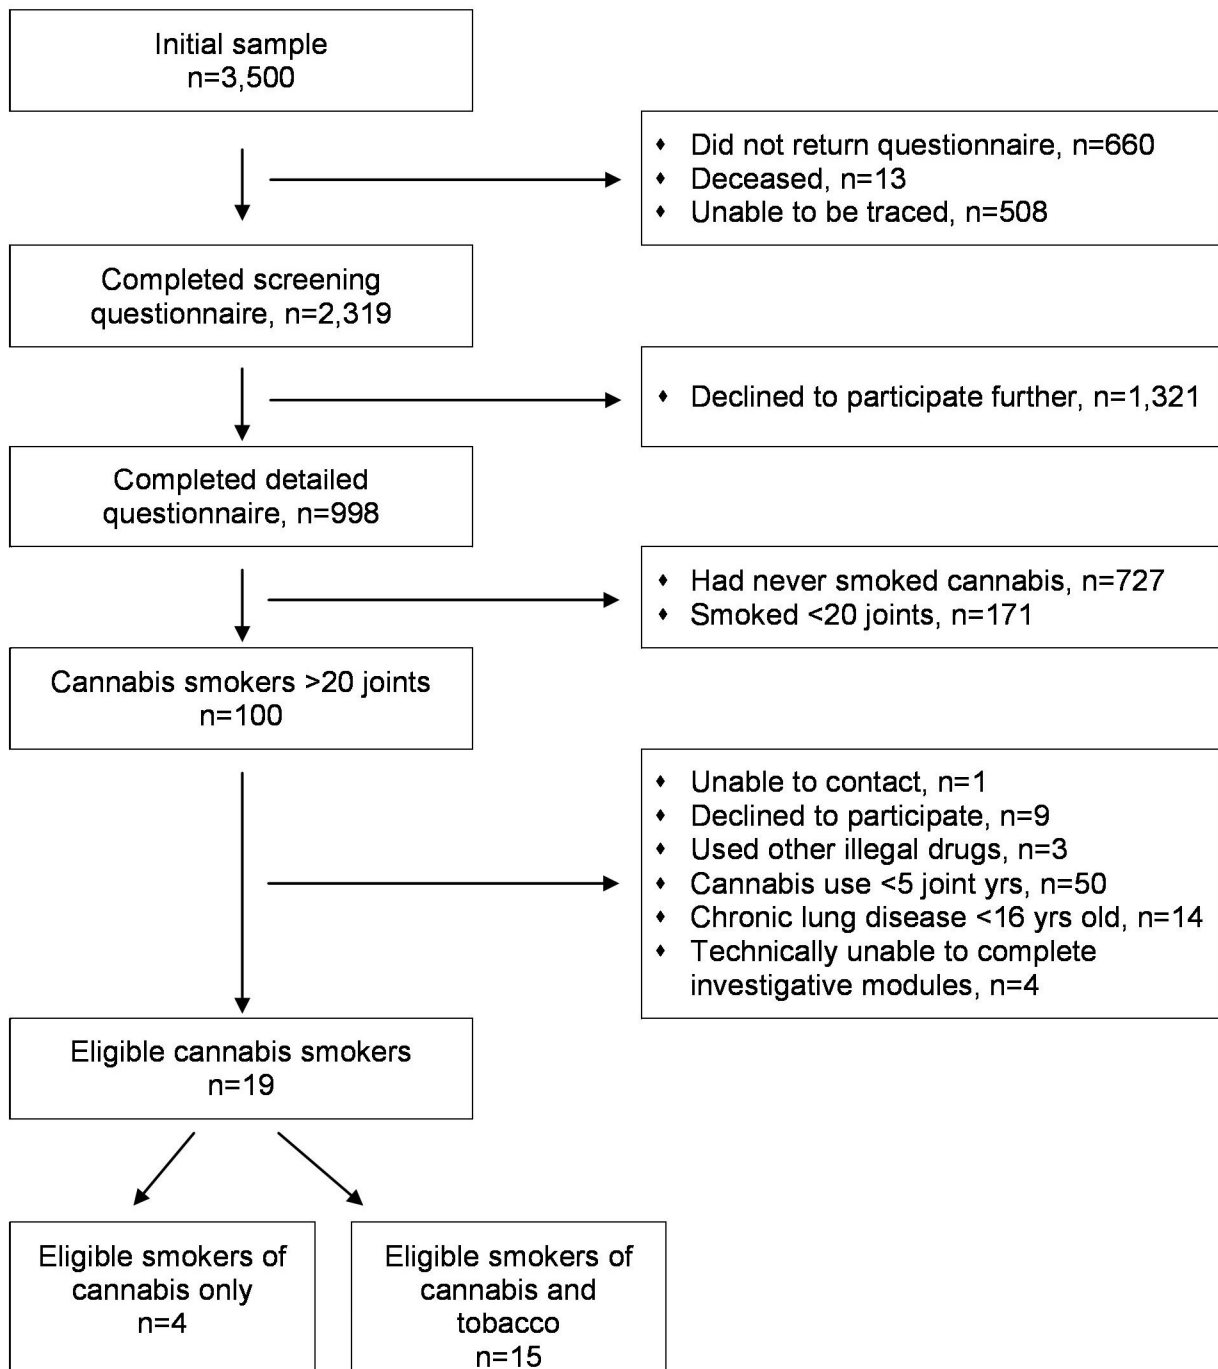

Supplement: thorax_thx.2006.077081_1.pdf [file thorax_thx.2006.077081_1.pdf]

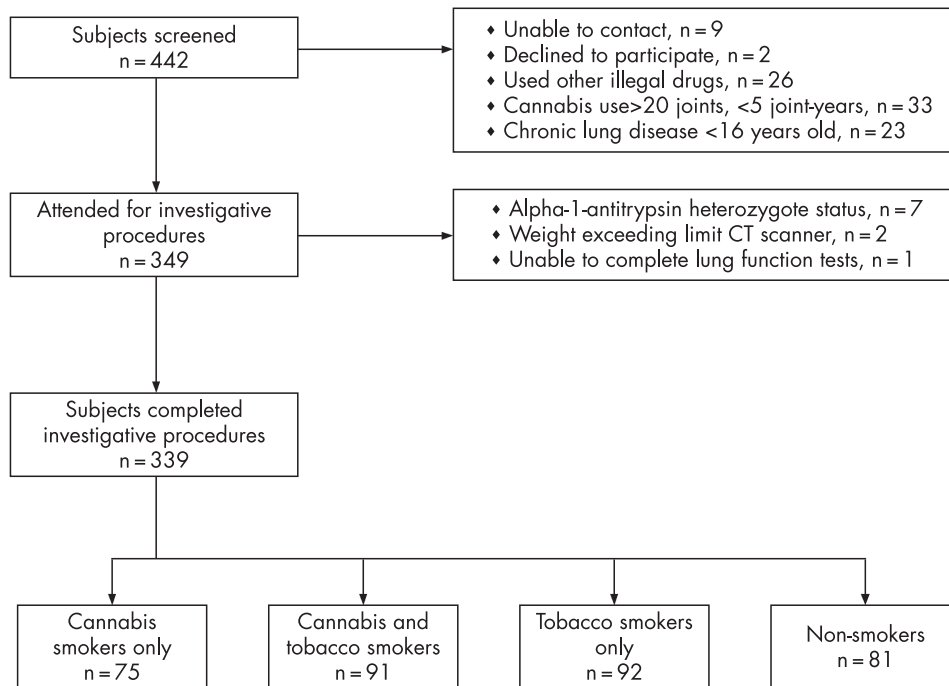

Supplement: thorax_thx.2006.077081_2.pdf [file thorax_thx.2006.077081_2.pdf]
